# Supplementary material
Source: PubMed Central journal article supplement (PMC3280058)

Figure e-1

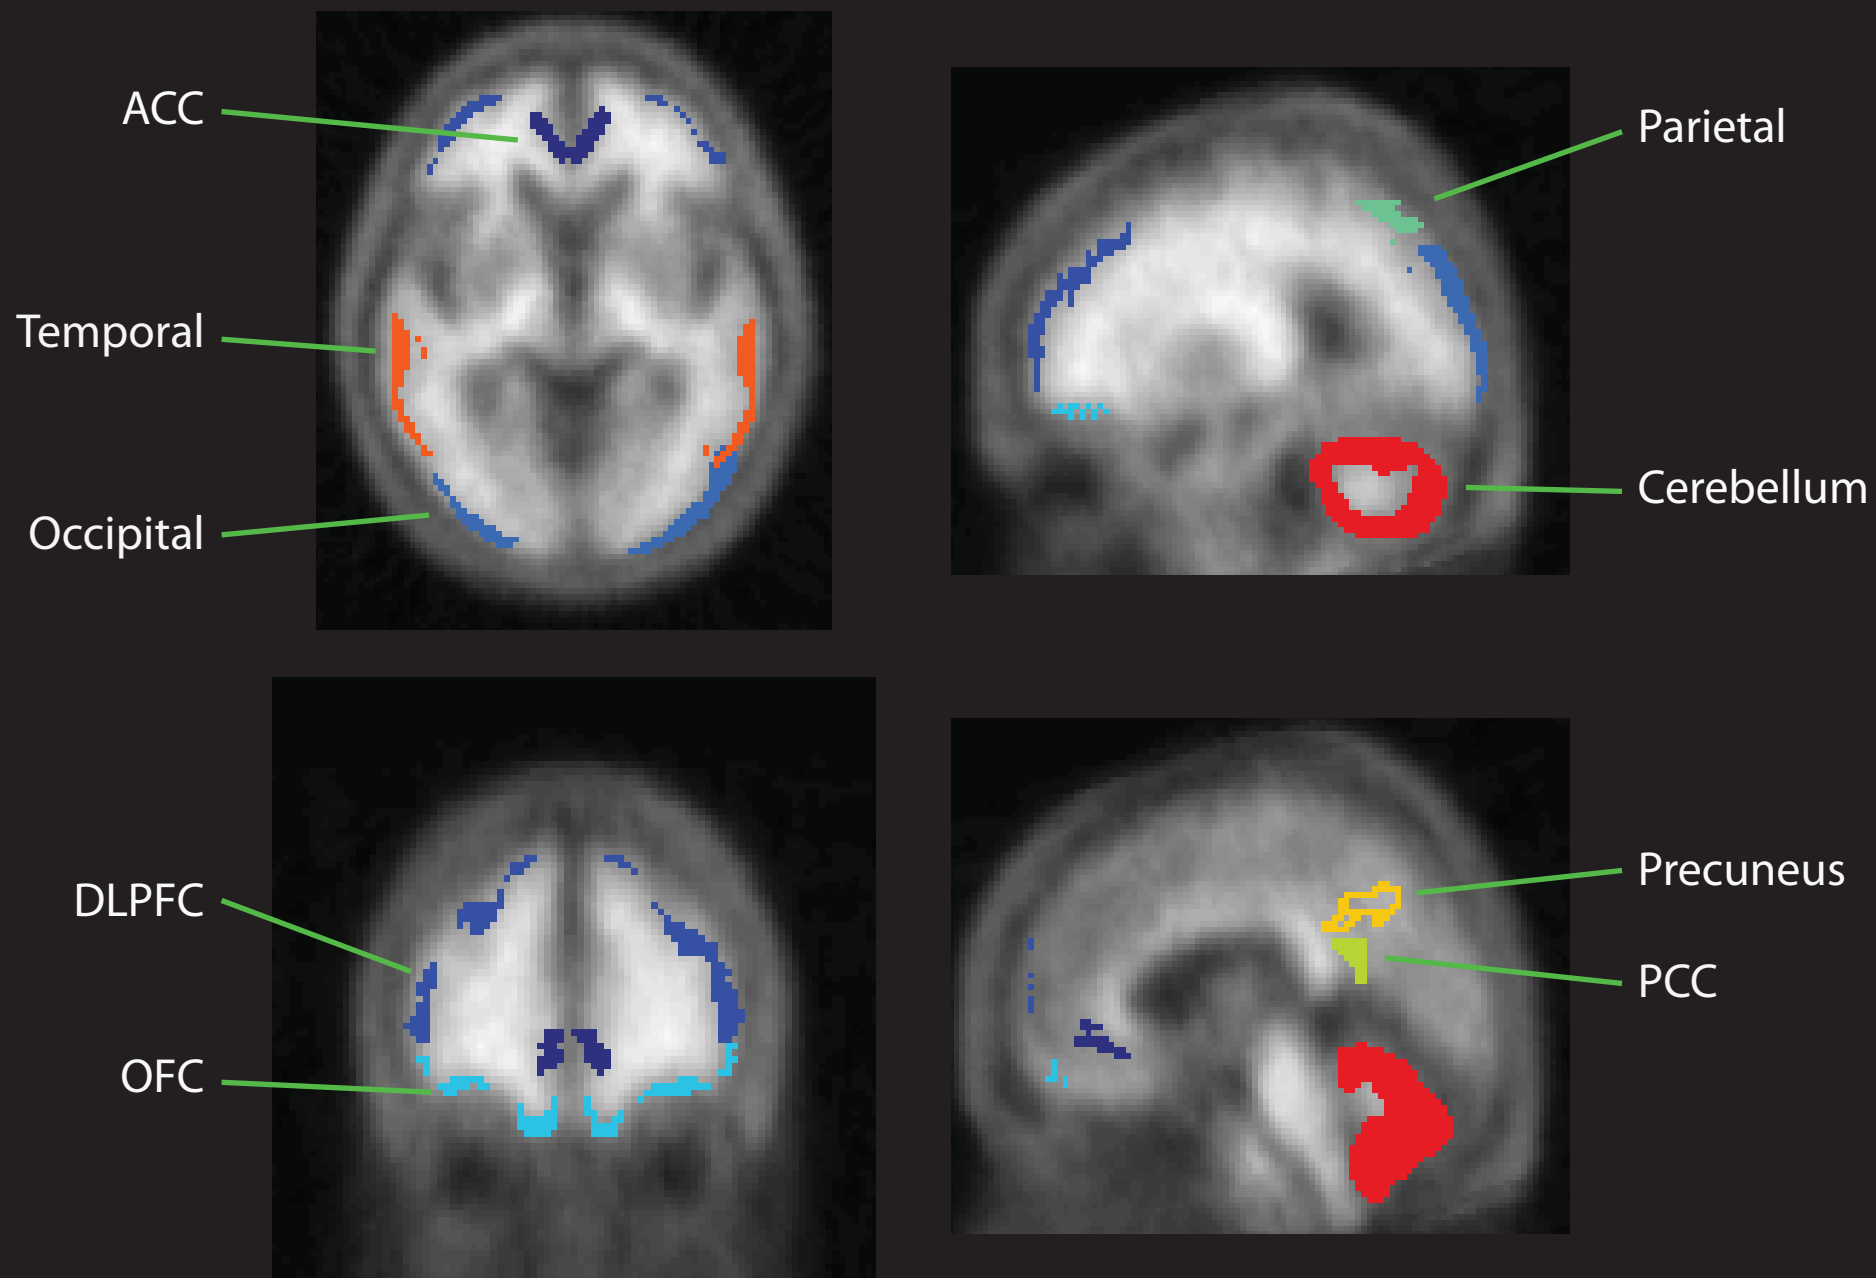

Supplement: supp_WNL.0b013e318245d295_WNL203400-399147_Figure_e-1.pdf [file supp_WNL.0b013e318245d295_WNL203400-399147_Figure_e-1.pdf]
